# Supplementary material for: Long non-coding RNA00364 represses hepatocellular carcinoma cell proliferation via modulating p-STAT3-IFIT2 signaling axis
Source: PubMed Central journal article supplement (PMC5731931; doi:10.18632/oncotarget.22039), 2017-10-25
Supplement: oncotarget-08-102006-s001.pdf [file oncotarget-08-102006-s001.pdf]

# Long non-coding RNA00364 represses hepatocellular carcinoma cell proliferation via modulating p-STAT3-IFIT2 signaling axis

## SUPPLEMENTARY MATERIALS

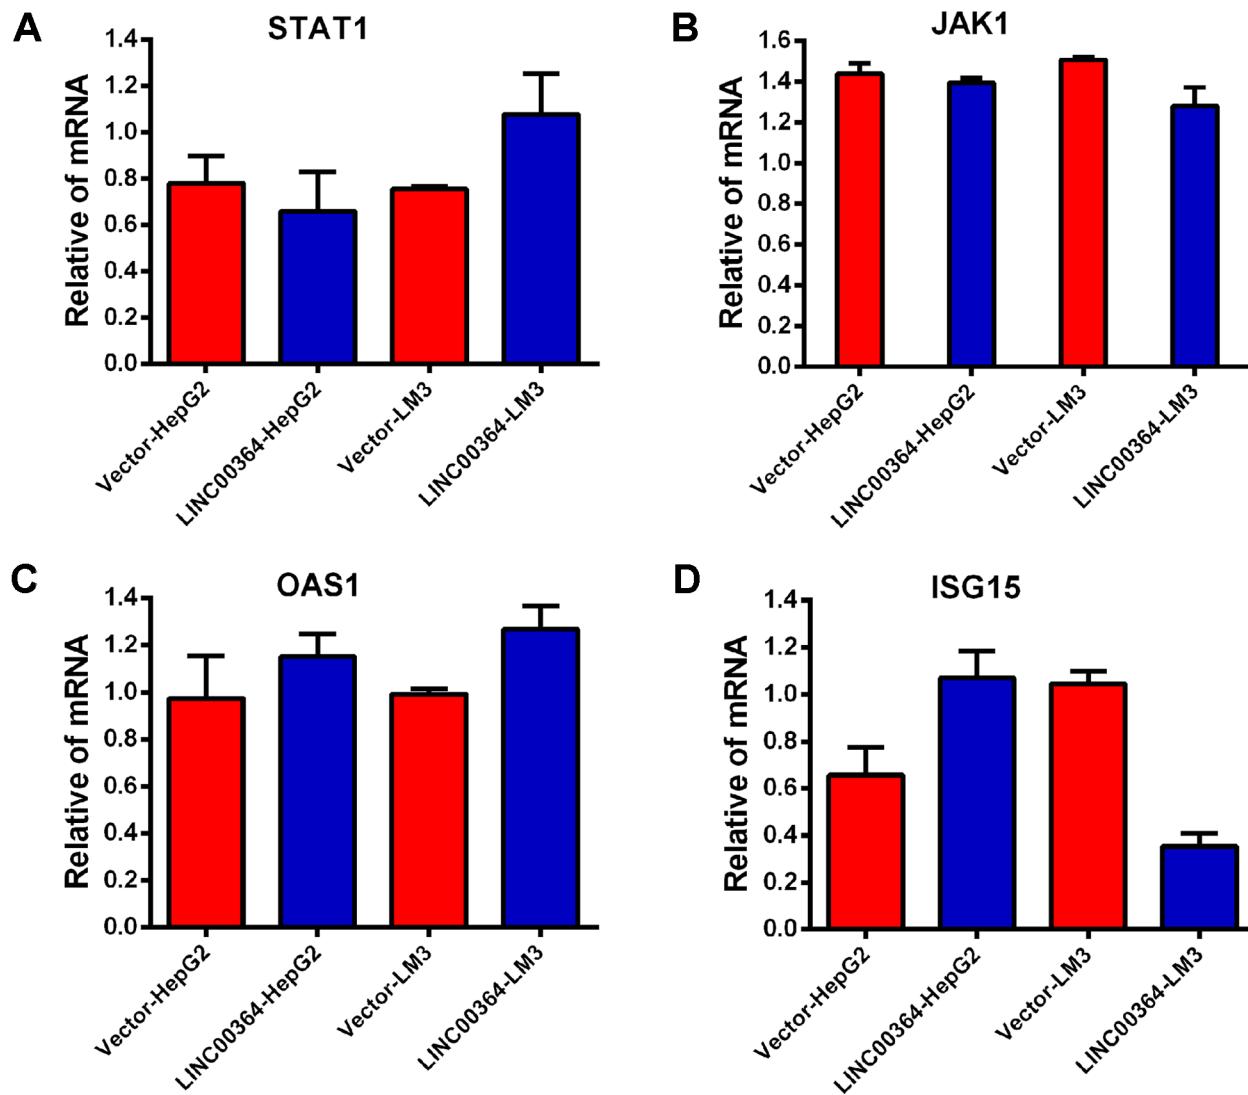

Supplementary Figure 1: The mRNA level of STAT1 (A), JAK1 (B), OAS1 (C) and ISG15 (D) analyzed by Real-time PCR assays.

**Supplementary Table 1: The upregulated genes induced by interferon- $\gamma$  treatment based on microarray analysis.**

**See Supplementary File 1**
